# Supplementary figures and images for: IL-2 Acclimatizes Newborn Calves to Beneficial Microorganisms via Intestine-Liver Axis
Source: Preprints.org preprint supplement (doi:10.20944/preprints202310.0733.v1), 2023-10-12

# Supplementary Materials

Analysis: L6yenc0220 - 2023-02-20 11:55 LLL

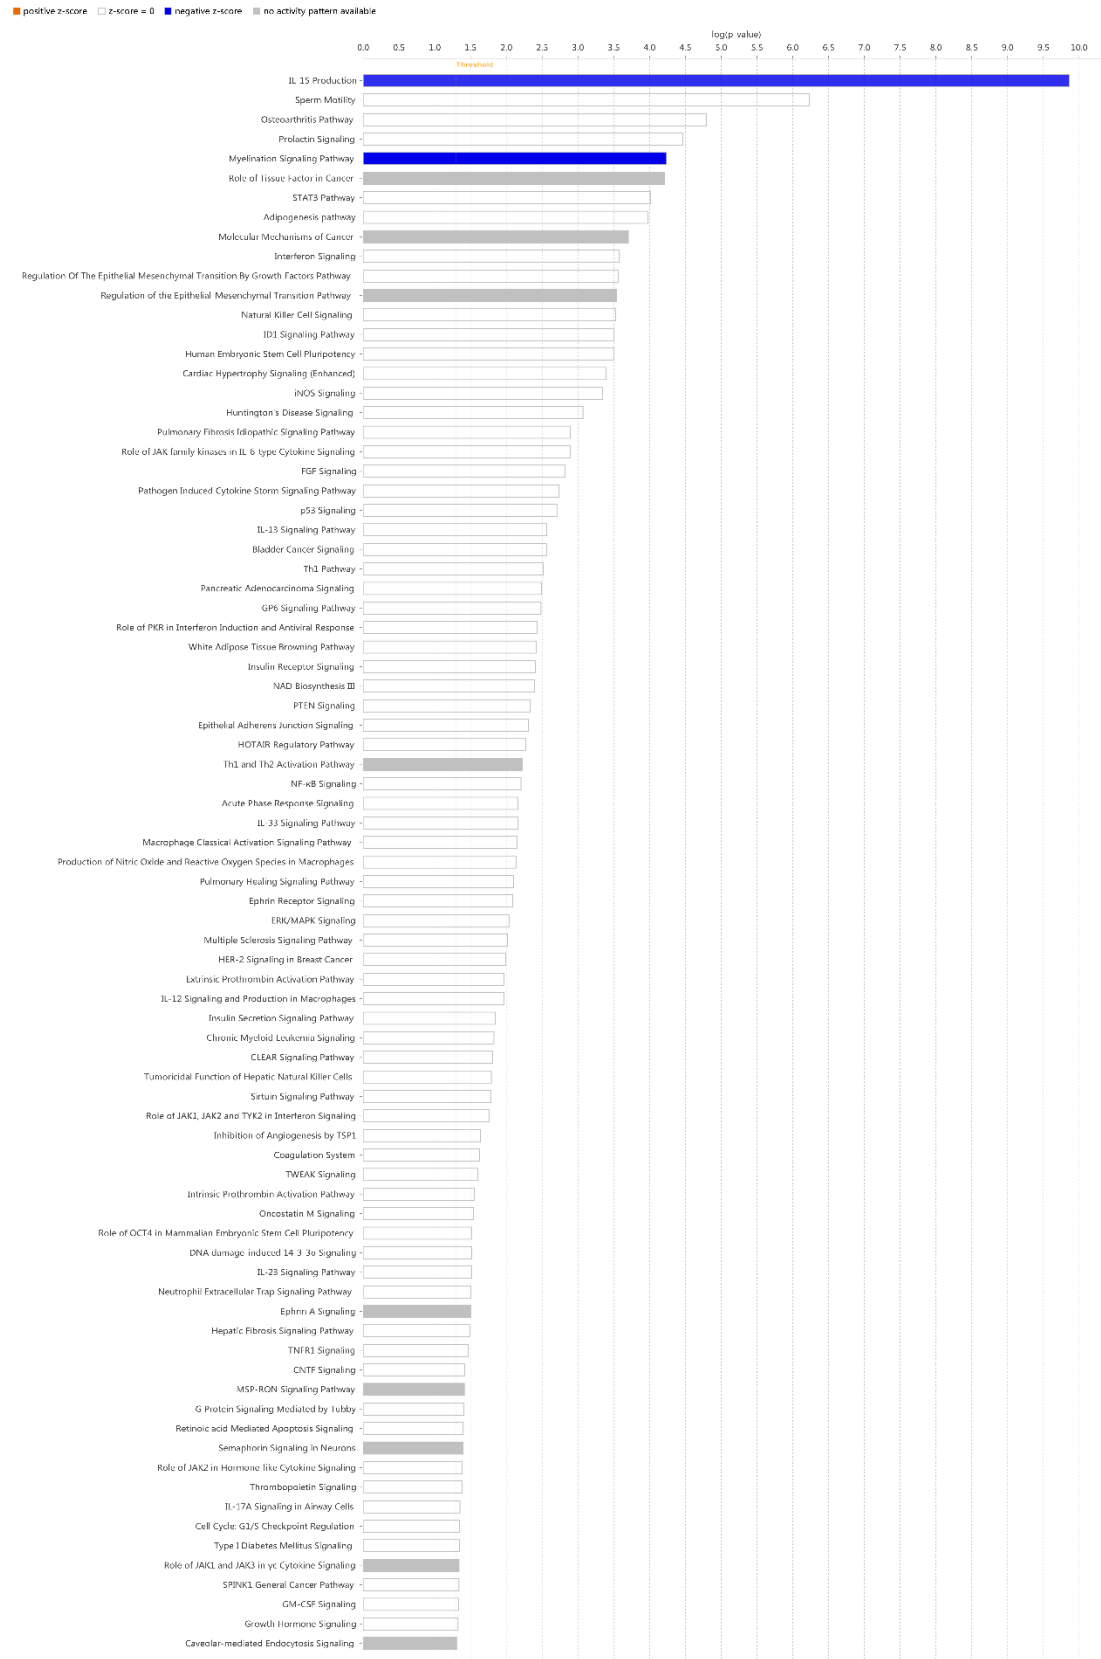

© 2000-2023 QIAGEN. All rights reserved.

Supplement: Supplementary file 1 [file supplementary]
